# Supplementary material for: Pre-pregnancy body mass index and gestational weight gain and their effects on pregnancy and birth outcomes: a cohort study in West Sumatra, Indonesia
Source: PubMed Central journal article supplement (PMC5679340; doi:10.1186/s12905-017-0455-2), 2017-11-09
Supplement: 12905_2017_455_MOESM1_ESM.pdf [file 12905_2017_455_MOESM1_ESM.pdf]

## Comparison of pregnancy and birth outcomes according to pre-pregnancy BMI categories using international and Asian classifications

|                                      | Sample proportion/<br>average | International BMI category pre-pregnancy |                 |                 |               |                  | ASIAN BMI category pre-pregnancy |                 |                 |                |                   |                 |
|--------------------------------------|-------------------------------|------------------------------------------|-----------------|-----------------|---------------|------------------|----------------------------------|-----------------|-----------------|----------------|-------------------|-----------------|
|                                      |                               | <18.5                                    | 18.5-24.9       | 25.0-29.9       | ≥30.0         | Overall p value  | <18.5                            | 18.5-22.9       | 23.0-27.4       | ≥27.5          | Overall p value   |                 |
| Mean GWG (kg)                        | 10.2                          | 12.7                                     | 10.0            | 7.6             | 5.4           | <b>0.000***</b>  | 12.7                             | 10.5            | 7.7             | 7.5            | <b>0.000***</b>   |                 |
| SD                                   | 6.0                           | 4.7                                      | 5.7             | 6.6             | 5.9           |                  | 4.7                              | 5.2             | 6.9             | 6.8            |                   |                 |
| n                                    | 544                           | 105                                      | 344             | 74              | 6             |                  | 105                              | 280             | 115             | 29             |                   |                 |
| Mean birthweight (g)                 | 3165                          | 3140                                     | 3159            | 3222            | 3683          | ‡ <b>0.040*</b>  | 3140                             | 3129            | 3258            | 3325           | ‡ <b>0.007***</b> |                 |
| SD                                   | 402                           | 370                                      | 382             | 479             | 519           |                  | 370                              | 380             | 433             | 462            |                   |                 |
| n                                    | 577                           | 107                                      | 347             | 72              | 6             |                  | 107                              | 281             | 116             | 28             |                   |                 |
| Mean number of AN visits             | 10.0                          | 10.2                                     | 9.9             | 11.0            | 8.7           | ‡ <b>0.161</b>   | 10.2                             | 9.7             | 10.9            | 10.2           | ‡ <b>0.069</b>    |                 |
| SD                                   | 3.6                           | 3.8                                      | 3.4             | 4.1             | 3.4           |                  | 3.8                              | 3.3             | 4.0             | 4.4            |                   |                 |
| n                                    | 565                           | 106                                      | 331             | 69              | 6             |                  | 106                              | 272             | 108             | 26             |                   |                 |
| Mean gestation at delivery (Weeks)   | 39.3                          | 39.4                                     | 39.2            | 39.7            | 40.3          | ‡ <b>0.830</b>   | 39.4                             | 39.2            | 39.4            | 39.6           | ‡ <b>0.964</b>    |                 |
| SD                                   | 2.6                           | 2.3                                      | 2.9             | 1.9             | 1.3           |                  | 2.3                              | 2.8             | 2.8             | 1.6            |                   |                 |
| n                                    | 217                           | 43                                       | 118             | 29              | 3             |                  | 43                               | 103             | 33              | 14             |                   |                 |
| Inadequate weight gain               | Int 297/529 (56.1%)           | Asian 268/597 (50.7%)                    | 50/105 (47.6%)  | 217/344 (63.1%) | 28/74 (37.8%) | 2/6 (33.3%)      | <b>§0.000***</b>                 | 50/105 (47.6%)  | 171/280 (61.1%) | 38/115 (33.0%) | 9/29 (31.0%)      | <b>0.000***</b> |
| Trimester 2 Haemoglobin <11.0g/dl    | 213/473 (45.0%)               | 44/87 (50.6%)                            | 125/280 (44.6%) | 16/53 (30.2%)   | 2/5 (40.0%)   | <b>§0.114</b>    | 44/87 (50.6%)                    | 107/229 (46.7%) | 29/89 (32.6%)   | 7/20 (35.0%)   | <b>0.056</b>      |                 |
| Trimester 3 Haemoglobin <11.0g/dl    | 157/464 (33.8%)               | 29/79 (36.7%)                            | 95/276 (34.4%)  | 15/55 (27.3%)   | 2/5 (40.0%)   | <b>§0.681</b>    | 29/79 (36.7%)                    | 78/223 (35.0%)  | 29/93 (31.2%)   | 5/20 (25.0%)   | <b>0.704</b>      |                 |
| Induction                            | 44/511 (8.6%)                 | 8/89 (9.0%)                              | 24/307 (7.8%)   | 9/66 (13.6%)    | 1/5 (20.0%)   | <b>§0.254</b>    | 8/89 (9.0%)                      | 18/243 (7.4%)   | 12/112 (10.7%)  | 4/23 (17.4%)   | <b>0.371</b>      |                 |
| Spontaneous vaginal delivery         | 484/591 (81.9%)               | 92/106 (86.8%)                           | 293/352 (83.2%) | 52/71 (73.2%)   | 4/6 (66.7%)   | <b>§0.067</b>    | 92/106 (86.8%)                   | 237/285 (83.2%) | 91/115 (79.1%)  | 21/29 (72.4%)  | <b>0.224</b>      |                 |
| Caesarean section                    | 86/598 (14.4%)                | 11/106 (10.4%)                           | 47/355 (13.2%)  | 15/73 (20.5%)   | 2/6 (33.3%)   | <b>0.121</b>     | 11/106 (10.4%)                   | 37/288 (12.8%)  | 19/117 (16.2%)  | 8/29 (27.6%)   | <b>0.092</b>      |                 |
| LBW <2.5kg                           | 19/577 (3.3%)                 | 4/107 (3.7%)                             | 7/347 (2.0%)    | 4/72 (5.6%)     | 0/6 (0%)      | <b>§0.281</b>    | 4/107 (3.7%)                     | 7/281 (2.5%)    | 3/116 (2.6%)    | 1/28 (3.6%)    | <b>§0.732</b>     |                 |
| Macrosomia >4.0kg                    | 10/577 (1.7%)                 | 1/107 (0.9%)                             | 5/347 (1.4%)    | 2/72 (2.8%)     | 2/6 (33.3%)   | <b>§0.006**</b>  | 1/107 (0.9%)                     | 3/281 (1.1%)    | 3/116 (2.6%)    | 3/28 (10.7%)   | <b>§0.018*</b>    |                 |
| SGA                                  | 26/204 (12.7%)                | 5/42 (11.9%)                             | 15/113 (13.3%)  | 3/29 (10.3%)    | 0/3 (0%)      | <b>§1.000</b>    | 5/42 (11.9%)                     | 15/99 (15.2%)   | 1/32 (3.1%)     | 2/14 (14.3%)   | <b>§0.318</b>     |                 |
| LGA                                  | 8/204 (3.9%)                  | 1/42 (2.4%)                              | 3/113 (2.7%)    | 4/29 (13.8%)    | 0/3 (0%)      | <b>§0.081</b>    | 1/42 (2.4%)                      | 2/99 (2.0%)     | 3/32 (9.4%)     | 2/14 (14.3%)   | <b>§0.050</b>     |                 |
| Born < 37 weeks                      | 40/217 (18.4%)                | 7/43 (16.3%)                             | 26/118 (22.0%)  | 2/29 (6.9%)     | 0/3 (0%)      | <b>§0.263</b>    | 7/43 (16.3%)                     | 23/103 (22.3%)  | 4/33 (12.1%)    | 1/14 (7.1%)    | <b>0.353</b>      |                 |
| Born > 42 weeks                      | 27/217 (12.4%)                | 4/43 (9.3%)                              | 16/118 (13.6%)  | 3/29 (10.3%)    | 0/3 (0%)      | <b>§0.872</b>    | 4/43 (9.3%)                      | 15/103 (14.6%)  | 3/33 (9.1%)     | 1/14 (7.1%)    | <b>§0.790</b>     |                 |
| Postpartum haemorrhage               | 33/542 (6.1%)                 | 5/94 (5.3%)                              | 20/327 (6.1%)   | 7/69 (10.1%)    | 1/6 (16.7%)   | <b>§0.284</b>    | 5/94 (5.3%)                      | 14/262 (5.3%)   | 12/113 (10.6%)  | 2/27 (7.4%)    | <b>0.275</b>      |                 |
| Sutures excluding Caesarean section  | 240/484 (49.6%)               | 53/91 (58.2%)                            | 143/294 (48.6%) | 24/56 (42.9%)   | 3/4 (75.0%)   | <b>§0.187</b>    | 53/91 (58.2%)                    | 125/239 (52.3%) | 37/96 (38.5%)   | 8/19 (42.1%)   | <b>0.037*</b>     |                 |
| Initial feed at breast               | 541/581 (93.1%)               | 102/106 (96.2%)                          | 331/348 (95.1%) | 59/73 (80.8%)   | 3/5 (60.0%)   | <b>§0.000***</b> | 102/106 (96.2%)                  | 268/281 (95.4%) | 102/117 (87.2%) | 23/28 (82.1%)  | <b>0.002**</b>    |                 |
| Breastfeeding at discharge           | 441/564 (78.2%)               | 82/101 (81.2%)                           | 274/342 (80.1%) | 47/71 (66.2%)   | 3/5 (60.0%)   | <b>§0.038*</b>   | 82/101 (81.2%)                   | 221/275 (80.4%) | 84/115 (73.0%)  | 19/28 (67.9%)  | <b>0.184</b>      |                 |
| Back pain                            | 21/539 (3.9%)                 | 4/96 (4.2%)                              | 12/329 (3.6%)   | 3/67 (4.5%)     | 0/5 (0%)      | <b>§0.856</b>    | 4/96 (4.2%)                      | 10/265 (3.8%)   | 5/111 (4.5%)    | 0/25 (0%)      | <b>§0.906</b>     |                 |
| Baby admitted to intensive care unit | 9/522 (1.7%)                  | 0/92 (0%)                                | 4/320 (1.3%)    | 2/64 (3.1%)     | 1/5 (20.0%)   | <b>§0.030*</b>   | 0/92 (0%)                        | 4/257 (1.6%)    | 1/109 (0.9%)    | 2/23 (8.7%)    | <b>§0.065</b>     |                 |

BMI, Body mass index

GWG, gestational weight gain

SD, standard deviation

n, number

AN, antenatal

LBW, low birth weight

SGA, small for gestational age

LGA, large for gestational age

ANOVA used for continuous data

Chi square used for categorical data

\*= p<0.05, \*\* = p<0.01, \*\*\* = p<0.001

‡ Kruskal - Wallis Test for continuous variables due to non-normality of distribution within each category

§ Exact test used where Chi square assumptions violated (expected count <5 in >20% of cells)
