# Supplementary material for: Pre-pregnancy body mass index and gestational weight gain and their effects on pregnancy and birth outcomes: a cohort study in West Sumatra, Indonesia
Source: PubMed Central journal article supplement (PMC5679340; doi:10.1186/s12905-017-0455-2), 2017-11-09
Supplement: 12905_2017_455_MOESM2_ESM.pdf [file 12905_2017_455_MOESM2_ESM.pdf]

## Pregnancy and birth outcomes in relation to various gestational weight gains according to IOM recommendations for all BMI groups combined based on international and Asian classifications

|                                      | IOM weight gain recommendations applied to international BMI classification |                    |                  |                   | IOM weight gain recommendations applied to Asian BMI classification |                    |                  |                 |
|--------------------------------------|-----------------------------------------------------------------------------|--------------------|------------------|-------------------|---------------------------------------------------------------------|--------------------|------------------|-----------------|
|                                      | Inadequate                                                                  | Recommended        | Excessive        | Overall p value   | Inadequate                                                          | Recommended        | Excessive        | Overall p value |
| Mean birthweight (g)                 | 3110                                                                        | 3208               | 3338             | ‡ <b>0.000***</b> | 3087                                                                | 3226               | 3309             | ‡               |
| SD                                   | 379                                                                         | 427                | 388              |                   | 370                                                                 | 427                | 396              | <b>0.000***</b> |
| N                                    | 285                                                                         | 169                | 60               |                   | 259                                                                 | 177                | 78               |                 |
| Mean number of AN visits             | 10.0                                                                        | 10.2               | 10.9             | ‡ <b>0.073</b>    | 9.8                                                                 | 10.3               | 10.9             | ‡ <b>0.015*</b> |
| SD                                   | 3.8                                                                         | 3.4                | 3.2              |                   | 3.8                                                                 | 3.5                | 3.3              |                 |
| N                                    | 273                                                                         | 163                | 58               |                   | 248                                                                 | 171                | 75               |                 |
| Mean gestation at delivery           | 38.9                                                                        | 40.1               | 39.7             | ‡ <b>0.053</b>    | 38.9                                                                | 40.0               | 39.7             | ‡ <b>0.088</b>  |
| SD                                   | 2.6                                                                         | 2.2                | 2.5              |                   | 2.7                                                                 | 2.3                | 2.3              |                 |
| N                                    | 107                                                                         | 57                 | 18               |                   | 101                                                                 | 56                 | 25               |                 |
| Haemoglobin <11.0g/dl in trimester 2 | 103/221<br>(46.6%)                                                          | 56/137<br>(40.9%)  | 21/49<br>(42.9%) | <b>0.558</b>      | 96/205<br>(46.8%)                                                   | 58/139<br>(41.7%)  | 26/63<br>(41.3%) | <b>0.566</b>    |
| Haemoglobin <11.0g/dl in trimester 3 | 85/228<br>(37.3%)                                                           | 39/132<br>(29.5%)  | 16/48<br>(33.3%) | <b>0.326</b>      | 79/208<br>(38.0%)                                                   | 41/139<br>(29.5%)  | 20/61<br>(32.8%) | <b>0.255</b>    |
| Induction                            | 19/250<br>(7.6%)                                                            | 16/151<br>(10.6%)  | 7/51<br>(13.7%)  | <b>0.310</b>      | 17/224<br>(7.6%)                                                    | 15/162<br>(9.3%)   | 10/66<br>(15.2%) | <b>0.177</b>    |
| Spontaneous vaginal delivery         | 241/289<br>(83.4%)                                                          | 134/166<br>(80.7%) | 49/61<br>(80.3%) | <b>0.714</b>      | 218/260<br>(83.8%)                                                  | 144/178<br>(80.9%) | 62/78<br>(79.5%) | <b>0.583</b>    |
| Caesarean section                    | 36/293<br>(12.3%)                                                           | 29/167<br>(17.4%)  | 8/61<br>(13.1%)  | <b>0.313</b>      | 31/264<br>(11.7%)                                                   | 30/179<br>(16.8%)  | 12/78<br>(15.4%) | <b>0.305</b>    |
| LBW <2.5kg                           | 9/285<br>(3.2%)                                                             | 6/169<br>(3.6%)    | 0/60<br>(0%)     | <b>§0.417</b>     | 9/259<br>(3.5%)                                                     | 5/177<br>(2.8%)    | 1/78<br>(1.3%)   | <b>0.599</b>    |
| Macrosomia >4.0kg                    | 2/285<br>(0.7%)                                                             | 6/169<br>(3.6%)    | 2/60<br>(3.3%)   | <b>§0.058</b>     | 1/259<br>(0.4%)                                                     | 6/177<br>(3.4%)    | 3/78<br>(3.8%)   | <b>§0.020*</b>  |
| SGA                                  | 18/102<br>(17.6%)                                                           | 4/56<br>(7.1%)     | 1/18<br>(5.6%)   | <b>0.105</b>      | 18/97<br>(18.6%)                                                    | 3/54<br>(5.6%)     | 2/25<br>(8.0%)   | <b>0.054</b>    |
| LGA                                  | 2/102<br>(2.0%)                                                             | 3/56<br>(5.4%)     | 2/18<br>(11.1%)  | <b>§0.122</b>     | 2/97<br>(2.1%)                                                      | 1/54<br>(1.9%)     | 4/25<br>(16.0%)  | <b>§0.014*</b>  |
| Born < 37 weeks                      | 25/107<br>(23.4%)                                                           | 5/57<br>(8.8%)     | 3/18<br>(16.7%)  | <b>0.068</b>      | 24/101<br>(23.8%)                                                   | 5/56<br>(8.9%)     | 4/25<br>(16.0%)  | <b>0.066</b>    |
| Born ≥ 42 weeks                      | 8/107<br>(7.5%)                                                             | 12/57<br>(21.1%)   | 2/18<br>(11.1%)  | <b>0.039*</b>     | 8/101<br>(7.9%)                                                     | 11/56<br>(19.6%)   | 3/25<br>(12.0%)  | <b>0.097</b>    |
| Postpartum Haemorrhage               | 15/263<br>(5.7%)                                                            | 9/157<br>(5.7%)    | 7/58<br>(12.1%)  | <b>0.183</b>      | 13/236<br>(5.5%)                                                    | 9/168<br>(5.4%)    | 9/74<br>(12.2%)  | <b>0.097</b>    |
| Sutures excluding CS                 | 108/244<br>(44.3%)                                                          | 77/135<br>(57.0%)  | 26/49<br>(53.1%) | <b>0.050</b>      | 99/221<br>(44.8%)                                                   | 84/146<br>(57.5%)  | 28/61<br>(45.9%) | <b>0.049*</b>   |
| Initial feed at breast               | 269/284<br>(94.7%)                                                          | 152/168<br>(90.5%) | 55/61<br>(90.2%) | <b>0.169</b>      | 242/256<br>(94.5%)                                                  | 163/178<br>(91.6%) | 71/79<br>(89.9%) | <b>0.278</b>    |
| Breastfeeding at discharge           | 210/275<br>(76.4%)                                                          | 131/166<br>(78.9%) | 46/59<br>(78.0%) | <b>0.820</b>      | 187/247<br>(75.7%)                                                  | 139/176<br>(79.0%) | 61/77<br>(79.2%) | <b>0.670</b>    |
| Back pain                            | 1/261<br>(0.4%)                                                             | 12/161<br>(7.5%)   | 6/58<br>(10.3%)  | <b>0.000***</b>   | 1/235<br>(0.4%)                                                     | 10/171<br>(5.8%)   | 8/74<br>(10.8%)  | <b>0.000***</b> |
| Baby admitted to intensive care unit | 2/252<br>(0.8%)                                                             | 3/157<br>(1.9%)    | 2/55<br>(3.6%)   | <b>§0.178</b>     | 2/226<br>(0.9%)                                                     | 2/167<br>(1.2%)    | 3/71<br>(4.2%)   | <b>§0.161</b>   |

IOM, institute of medicine

BMI, Body mass index

SD, standard deviation

n, number

AN, antenatal

LBW, low birth weight

SGA, small for gestational age

LGA, large for gestational age

\*= p<0.05, \*\* = p<0.01, \*\*\* = p<0.001

Chi-square test used for categorical data

‡ Kruskal - Wallis Test for continuous variables due to non-normality of distribution within each category

§ Exact test used where Chi-square test assumptions violated (expected count <5 in >20% of cells)
